# Supplementary material for: Warming enabled upslope advance in western US forest fires
Source: PubMed Central journal article supplement (PMC8179236; doi:10.1073/pnas.2009717118), 2021-05-24
Supplement: pnas.2009717118.sapp.pdf [file pnas.2009717118.sapp.pdf]

## Supplementary Information

for

### Warming Enabled Upslope Advance in Western U.S. Forest Fires

Mohammad Reza Alizadeh<sup>1</sup>, John T. Abatzoglou<sup>2</sup>, Charles H. Luce<sup>3</sup>, Jan Adamowski<sup>1</sup>, Arvin Farid<sup>4</sup>,  
Mojtaba Sadegh<sup>4,\*</sup>

<sup>1</sup> Department of Bioresource Engineering, McGill University, Quebec, CANADA.

<sup>2</sup> Management of Complex Systems Department, University of California, Merced, Merced, CA, UNITED STATES.

<sup>3</sup> US Forest Service Aquatic Science Laboratory, Rocky Mountain Research Station, Boise, ID, UNITED STATES.

<sup>4</sup> Department of Civil Engineering, Boise State University, Boise, ID, UNITED STATES.

\*Correspondence to [mojtabasadegh@boisestate.edu](mailto:mojtabasadegh@boisestate.edu)

Throughout this document, we refer to “ $Z_{90}$ ” as the 90<sup>th</sup> percentile of normalized annual elevational distribution of burned forest in each ecoregion. Here, the term “normalized” essentially refers to the fraction of burned forest as a function of elevation. Further, we refer to “ $BA_{90}$ ” as the annual forest burned area above the 90<sup>th</sup> percentile of the forest elevational distribution in each ecoregion. Also, VPD and CWD represent vapor pressure deficit and climatic water deficit, respectively, and NDVI represents normalized difference vegetation index.

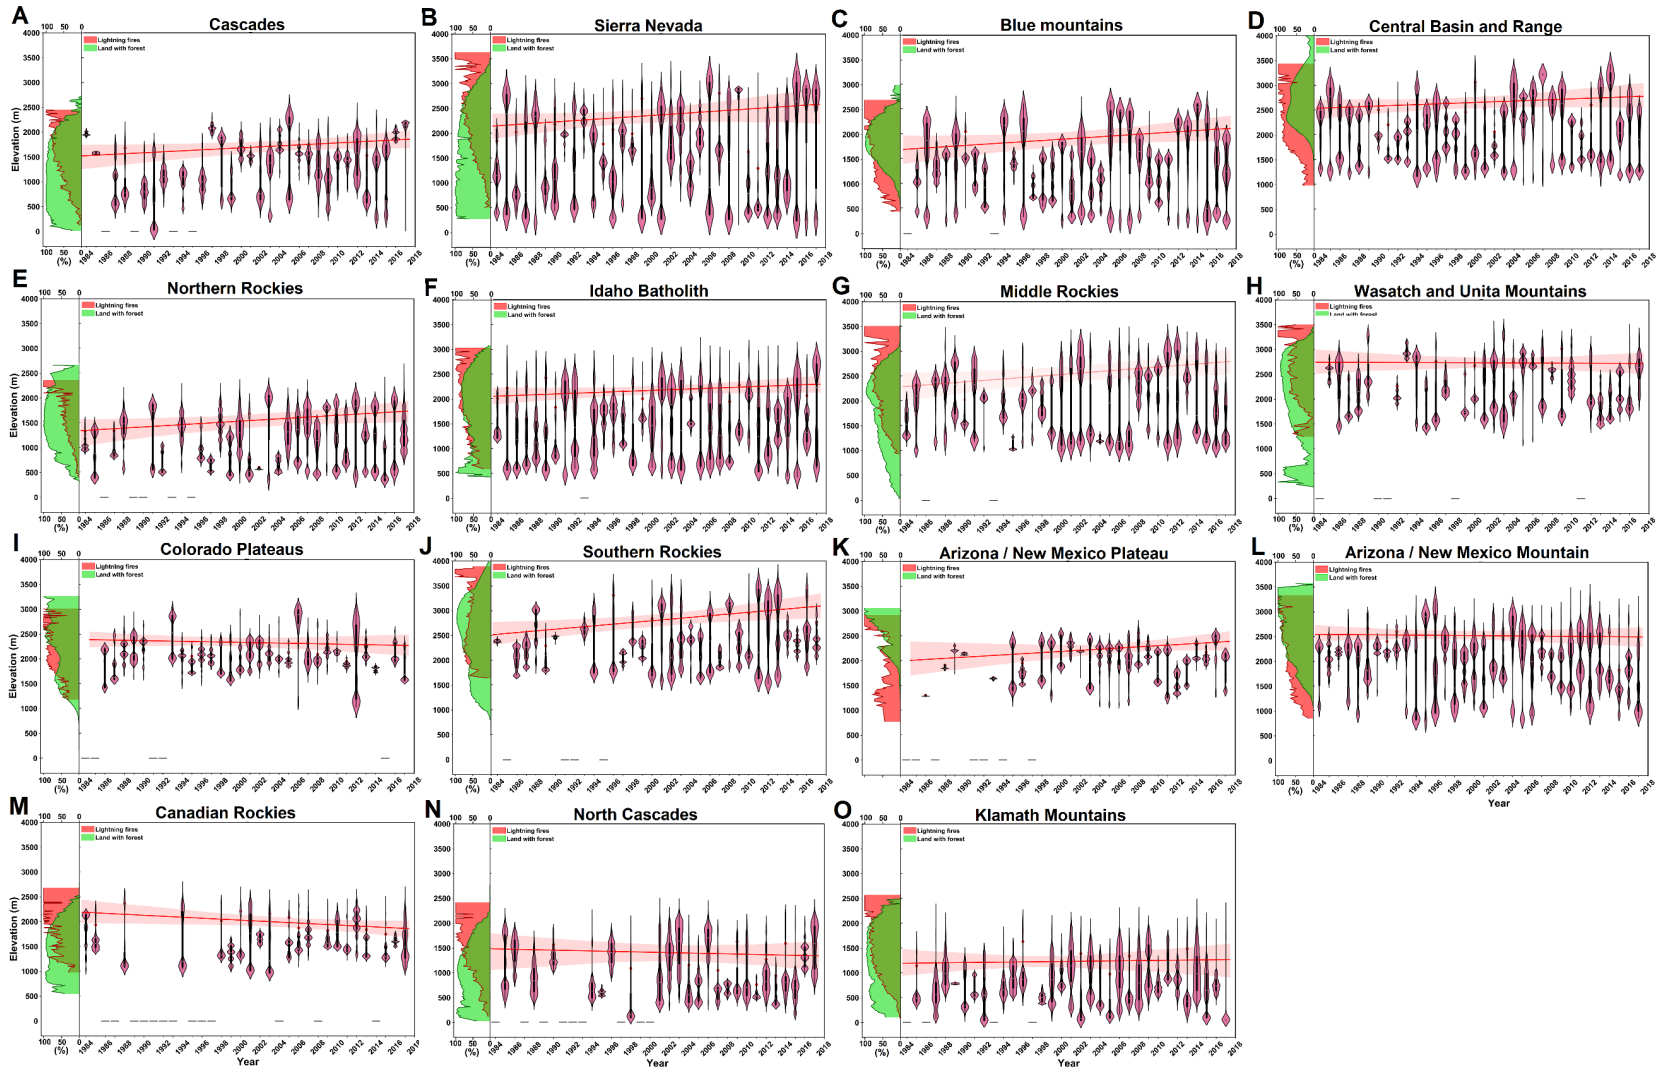

**Figure S1. Time series of normalized annual elevational distribution of burned forest across ecoregions.** The left panel shows the percent forest cover across elevation (green) and percent of fires that are lightning-caused (red). Violin plots for each year show normalized elevational distribution of burned forest. “Normalized” refers to the fraction of forest that is burned by elevation. Red line indicates slope of  $Z_{90}$  during 1984-2017, with uncertainty range shown with shaded area. Analysis is based on observed burned forest data.

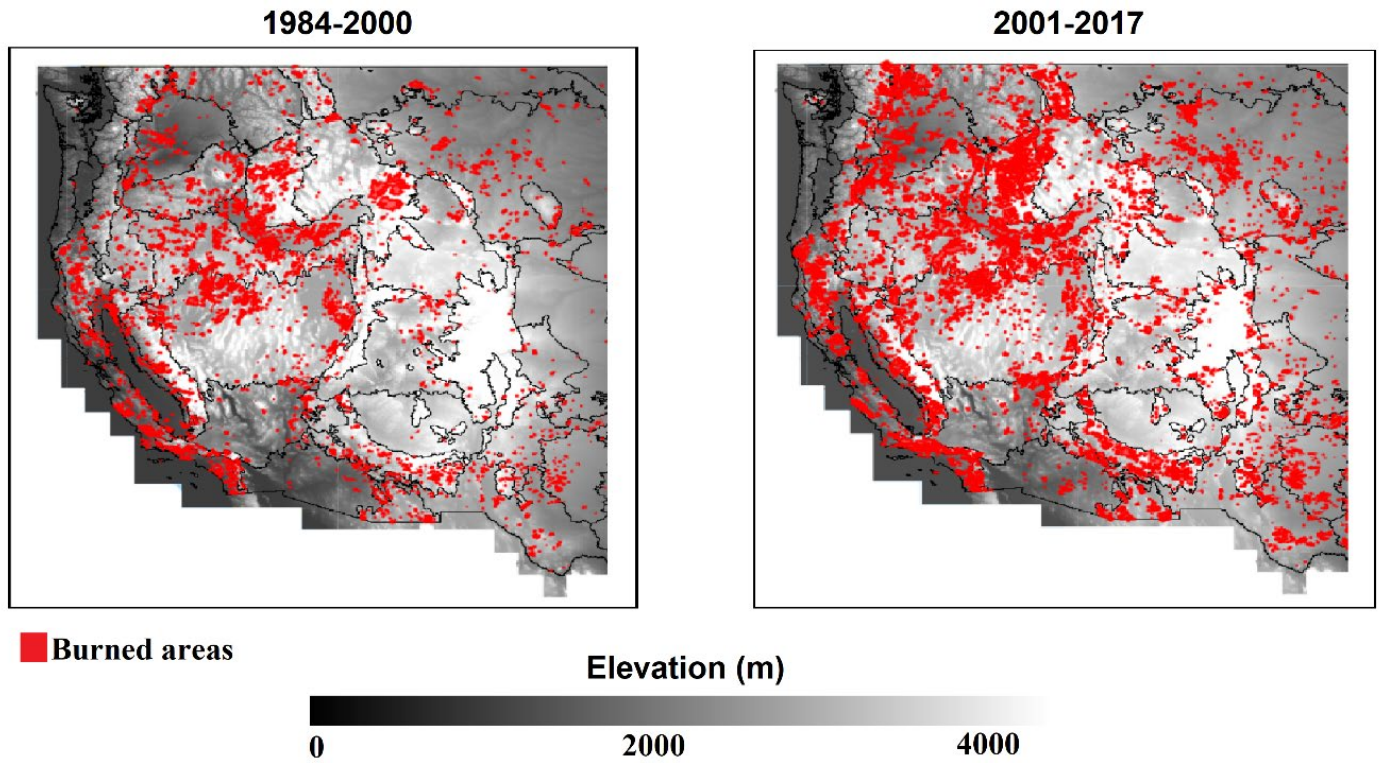

Figure S2. Spatial distribution of burned forest in the periods of 1984-2000 and 2001-2017 (marked with red) on a digital elevation map (grey scale). Visualization is based on observed burned forest data.

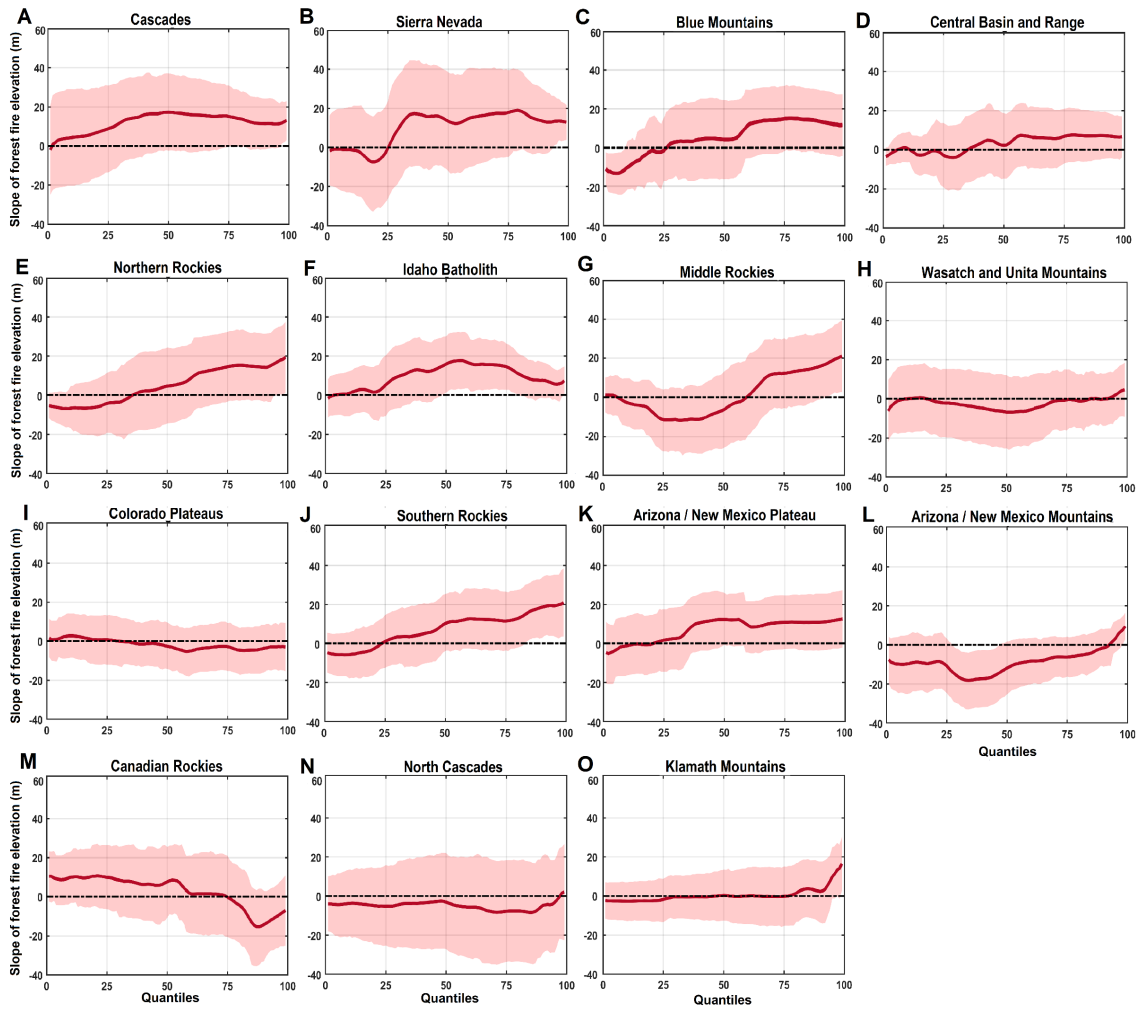

**Figure S3. Quantile regression analysis of normalized annual elevations of burned forest.** **A:** Cascades, **B:** Sierra Nevada, **C:** Blue Mountains, **D:** Central Basin and Range, **E:** Northern Rockies, **F:** Idaho Batholith, **G:** Middle Rockies, **H:** Wasatch and Unita Mountains, **I:** Colorado Plateaus, **J:** Southern Rockies, **K:** Arizona / New Mexico Plateau, **L:** Arizona / New Mexico Mountains, **M:** Canadian Rockies, **N:** North Cascades, **O:** Klamath Mountains / California High North Coast Range. Quantile regression is conducted on normalized annual elevational distribution of burned forest in each ecoregion to quantify elevational trends in burned forest across different elevations. Smaller quantiles represent lower-elevation fires and larger quantiles represent higher-elevation fires. Trends in the 90<sup>th</sup> quantile is equivalent to  $Z_{90}$  as explained in the main paper.

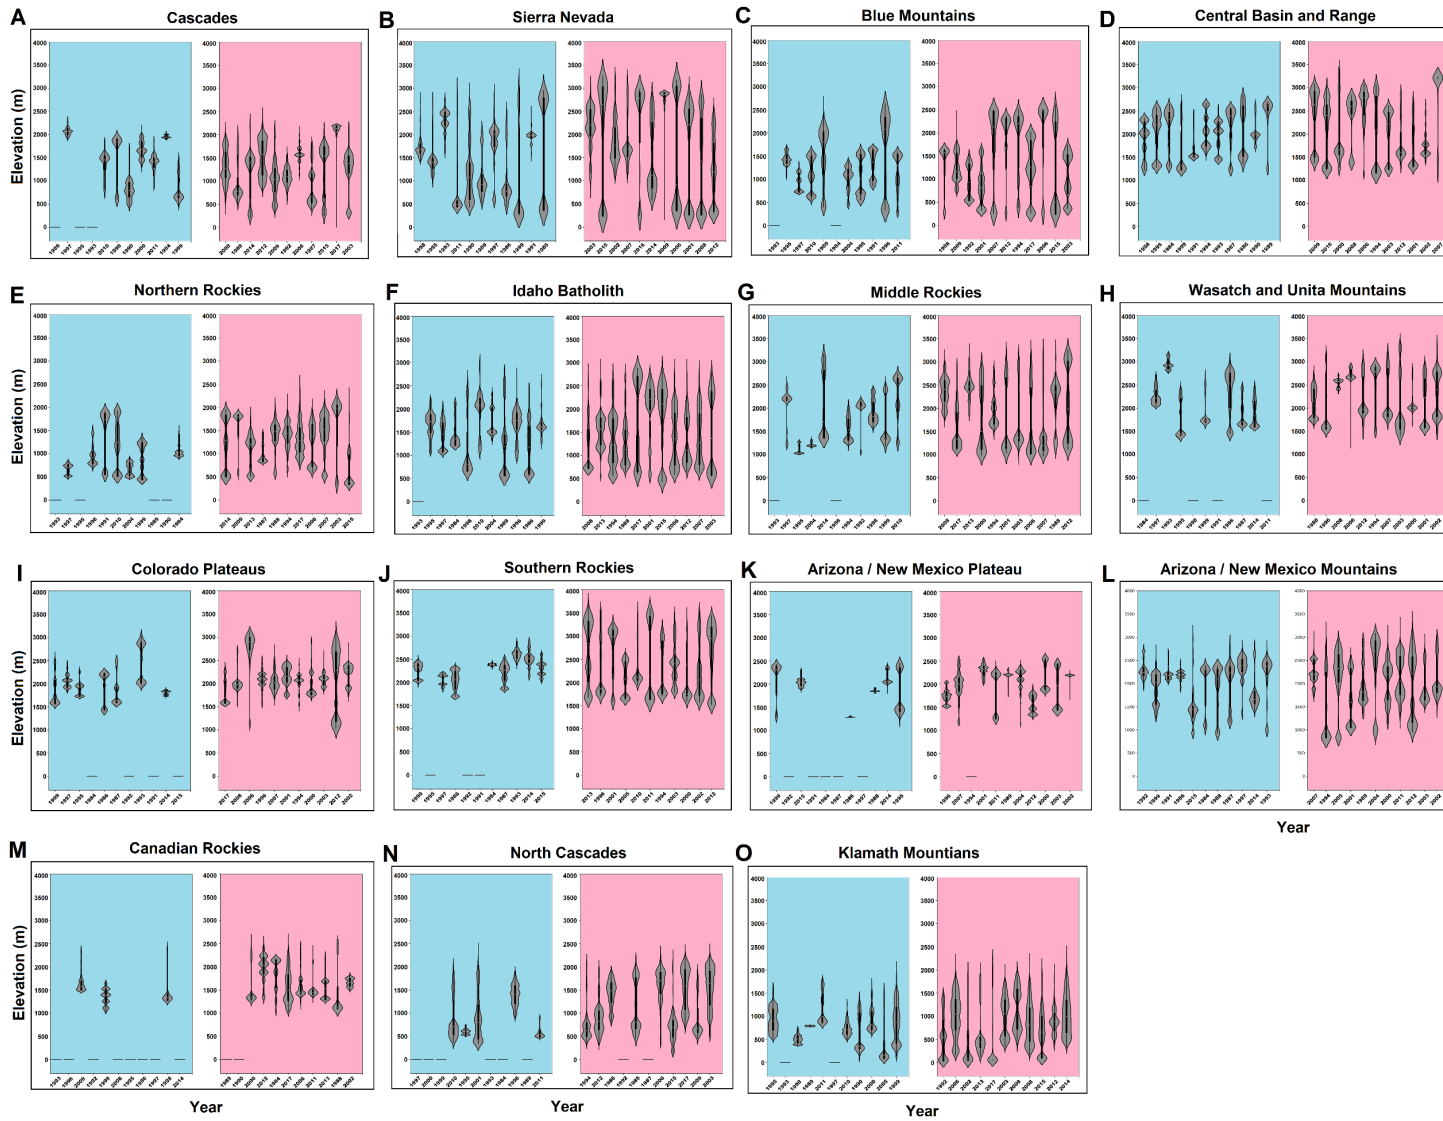

**Figure S4. Normalized annual elevational distribution of burned forest for low-VPD warm seasons (blue background; lower tercile of VPD) and high-VPD warm seasons (red background; higher tercile of VPD). No-fire years are marked with dashes on a zero elevation. Warm season is defined as May-September. Ecoregion-average warm-season VPD is used. Visualization is based on observed burned forest data.**

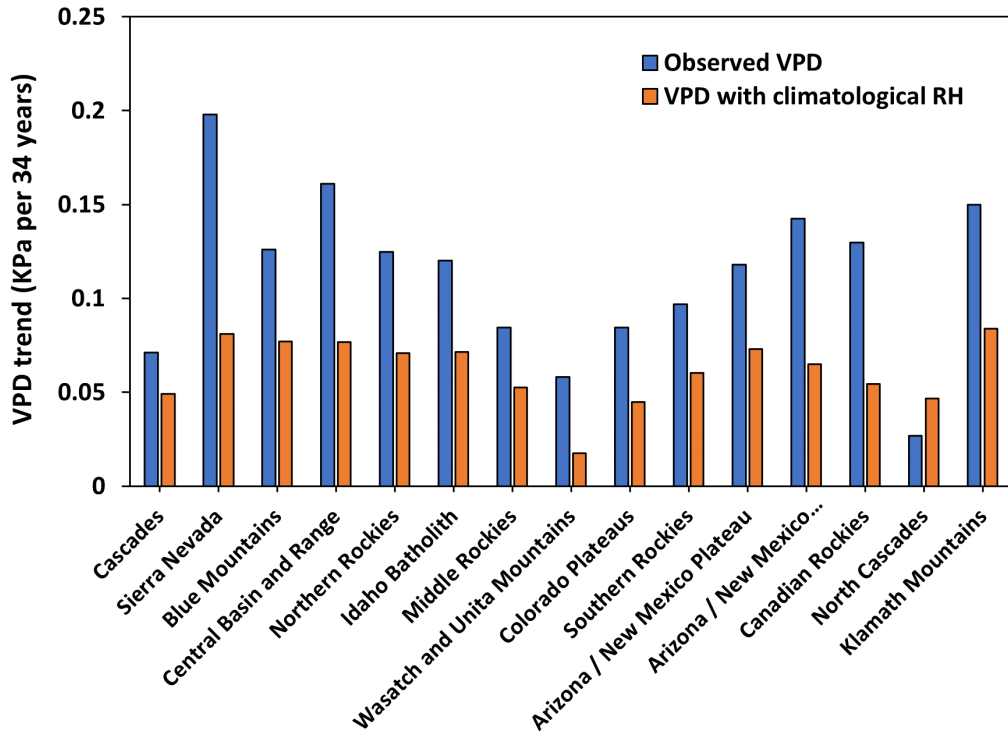

**Figure S5. Observed warm-season VPD trends (blue) and trends attributed to warming (orange) during 1984-2017 for each ecoregion.** To decompose the VPD trends, relative humidity was prescribed at mean values for 1984-2017 for each ecoregion allowing for an estimate of VPD trends exclusively tied to changes in air temperature. Across all ecoregions, a median of 60% of VPD trends can be attributed to changes in air temperature.

**Table S1. Trends in  $Z_{90}$  and warm-season VPD isoline elevations in each ecoregion during 1984-2017, as well as their 95% confidence interval.** Linear trend analysis is conducted on the observed burned forest elevation and May-September ecoregion-average values of observed VPD. Trend in VPD elevation is calculated as a product of temporal gradient of VPD and elevational gradient of VPD.

| Ecoregion                      | Trends (m) in $Z_{90}$ in during 1984-2017* |             |             | Trends (m) in elevation of VPD isolines during 1984-2017 |             |             |
|--------------------------------|---------------------------------------------|-------------|-------------|----------------------------------------------------------|-------------|-------------|
|                                | Average (Fig. 1)                            | Lower bound | Upper bound | Average (Fig. 4)                                         | Lower bound | Upper bound |
| Cascades                       | 338.60                                      | -50.92      | 728.13      | 601.83                                                   | 23.22       | 1331.30     |
| Sierra Nevada                  | 443.87                                      | -107.00     | 994.74      | 514.47                                                   | 198.86      | 840.71      |
| Blue Mountains                 | 420.03                                      | -97.95      | 938.01      | 483.20                                                   | 97.06       | 892.11      |
| Central Basin and Range        | 243.65                                      | -168.70     | 656.01      | 287.54                                                   | 29.53       | 555.58      |
| Northern Rockies               | 404.96                                      | -94.89      | 904.80      | 284.99                                                   | 13.67       | 568.32      |
| Idaho Batholith                | 252.81                                      | -48.64      | 554.25      | 441.89                                                   | 99.83       | 798.40      |
| Middle Rockies                 | 505.73                                      | -33.69      | 1045.15     | 295.02                                                   | 151.32      | 757.45      |
| Wasatch and Unita Mountains    | -16.45                                      | -400.64     | 367.74      | 170.65                                                   | 73.13       | 429.83      |
| Colorado Plateaus              | -110.11                                     | -463.11     | 242.89      | 182.26                                                   | 27.08       | 404.78      |
| Southern Rockies               | 549.65                                      | 85.63       | 1013.66     | 358.39                                                   | 32.52       | 704.44      |
| Arizona / New Mexico Plateau   | 296.45                                      | -94.55      | 687.45      | 147.45                                                   | 11.97       | 289.07      |
| Arizona / New Mexico Mountains | -52.60                                      | -376.86     | 271.66      | 191.08                                                   | 2.14        | 383.30      |
| Canadian Rockies               | -315.08                                     | -693.39     | 63.23       | 590.93                                                   | 59.32       | 1218.45     |
| North Cascades                 | -109.38                                     | -736.04     | 517.29      | 149.47                                                   | 62.66       | 375.68      |
| Klamath Mountains / ...        | 57.49                                       | -411.87     | 526.86      | 474.03                                                   | 71.57       | 916.05      |
| Median: all ecoregions         | 252.81                                      | -107        | 656.01      | 295.02                                                   | 59.32       | 704.44      |

\* The slope of the 90<sup>th</sup> quantile (m/yr) of normalized annual elevational distribution of burned forest is multiplied by the number of years with forest fire activity to calculate the increase in  $Z_{90}$  for each ecoregion during 1984-2017. Similarly, the lower and upper bounds of the 95% confidence interval, CI, for the slope of the 90<sup>th</sup> quantile (m/yr) are multiplied by the number of years with forest fire activity to estimate the 95% CI of  $Z_{90}$  trends for each ecoregion. A similar approach was adopted for calculating uncertainty ranges of trends in elevation of VPD isolines.

**Table S2. Average forest burned area (BA; ha/yr) in different elevation bands during 1984-2000 and 2001-2017.** Annual observed burned forest data is used in this analysis.

| Ecoregion                      | Periods               | Elevation bands (m) |          |           |           |           |           |          |
|--------------------------------|-----------------------|---------------------|----------|-----------|-----------|-----------|-----------|----------|
|                                |                       | 0- 500              | 500-1000 | 1000-1500 | 1500-2000 | 2000-2500 | 2500-3000 | >3000    |
| Cascades                       | BA (ha/yr): 1984-2000 | 679.78              | 2838.30  | 2827.46   | 397.01    | 125.47    | 0         | 0        |
|                                | BA (ha/yr): 2001-2017 | 2777.41             | 3511.62  | 5328.51   | 4173.41   | 1691.41   | 0.66      | 0        |
|                                | Percent change        | 308.57              | 23.72    | 88.46     | 951.20    | 1248.09   | Infinity  | -        |
| Sierra Nevada                  | BA (ha/yr): 1984-2000 | 6075.86             | 3641.87  | 2138.59   | 1621.43   | 2351.35   | 1168.20   | 433.27   |
|                                | BA (ha/yr): 2001-2017 | 11516.02            | 3690.85  | 4690.40   | 4812.67   | 4577.02   | 7587.13   | 4130.01  |
|                                | Percent change        | 89.54               | 1.34     | 119.32    | 196.82    | 94.66     | 549.47    | 853.22   |
| Blue Mountains                 | BA (ha/yr): 1984-2000 | 3540.48             | 788.74   | 1475.29   | 3936.94   | 8962.57   | 2132.39   | 0        |
|                                | BA (ha/yr): 2001-2017 | 6931.75             | 1141.10  | 1673.02   | 3467.15   | 12131.10  | 7903.48   | 0        |
|                                | Percent change        | 95.79               | 44.67    | 13.40     | -11.93    | 35.35     | 270.64    | -        |
| Central Basin and Range        | BA (ha/yr): 1984-2000 | 0                   | 0        | 3552.39   | 2500.95   | 1538.31   | 2014.10   | 2389.94  |
|                                | BA (ha/yr): 2001-2017 | 0                   | 0        | 3488.21   | 3619.49   | 3364.19   | 5160.87   | 7452.70  |
|                                | Percent change        | -                   | -        | -1.81     | 44.72     | 118.69    | 156.24    | 211.84   |
| Northern Rockies               | BA (ha/yr): 1984-2000 | 57.69               | 1089.51  | 2852.94   | 3618.33   | 130.23    | 0         | 0        |
|                                | BA (ha/yr): 2001-2017 | 16570.20            | 6025.08  | 9294.92   | 5981.86   | 2394.39   | 110.22    | 0        |
|                                | Percent change        | 28620.47            | 453.01   | 225.80    | 65.32     | 1738.56   | Infinity  | -        |
| Idaho Batholith                | BA (ha/yr): 1984-2000 | 523.11              | 14076.26 | 7699.96   | 10626.47  | 3372.21   | 1209.40   | 0        |
|                                | BA (ha/yr): 2001-2017 | 9863.45             | 22011.07 | 12523.41  | 14291.34  | 9897.37   | 4390.95   | 21.88    |
|                                | Percent change        | 1785.55             | 56.37    | 62.64     | 34.49     | 193.50    | 263.07    | Infinity |
| Middle Rockies                 | BA (ha/yr): 1984-2000 | 0                   | 2808.79  | 9869.70   | 2535.82   | 17576.38  | 8943.37   | 2672.64  |
|                                | BA (ha/yr): 2001-2017 | 0                   | 3929.46  | 14460.50  | 2511.14   | 4516.76   | 5045.50   | 2617.21  |
|                                | Percent change        | -                   | 39.90    | 46.51     | -0.97     | -74.30    | -43.58    | -2.07    |
| Wasatch and Unita Mountains    | BA (ha/yr): 1984-2000 | 0                   | 0        | 328.46    | 700.79    | 595.03    | 462.56    | 248.13   |
|                                | BA (ha/yr): 2001-2017 | 0                   | 0        | 604.58    | 3500.81   | 1413.64   | 2901.13   | 616.10   |
|                                | Percent change        | -                   | -        | 84.07     | 399.55    | 137.58    | 527.19    | 148.29   |
| Colorado Plateaus              | BA (ha/yr): 1984-2000 | 0                   | 0        | 40.17     | 1290.25   | 1593.77   | 185.43    | 0.00     |
|                                | BA (ha/yr): 2001-2017 | 0                   | 0        | 5244.04   | 1923.38   | 4161.00   | 1559.95   | 1099.09  |
|                                | Percent change        | -                   | -        | 12953.32  | 49.07     | 161.08    | 741.24    | Infinity |
| Southern Rockies               | BA (ha/yr): 1984-2000 | 0                   | 0        | 0         | 3538.27   | 765.98    | 1119.00   | 1495.05  |
|                                | BA (ha/yr): 2001-2017 | 0                   | 0        | 0         | 9361.08   | 7214.71   | 3763.06   | 11445.11 |
|                                | Percent change        | -                   | -        | -         | 164.57    | 841.90    | 236.29    | 665.53   |
| Arizona / New Mexico Plateau   | BA (ha/yr): 1984-2000 | 0                   | 0        | 223.00    | 245.15    | 596.30    | 208.78    | 0        |
|                                | BA (ha/yr): 2001-2017 | 0                   | 0        | 295.22    | 655.90    | 1472.37   | 235.62    | 0        |
|                                | Percent change        | -                   | -        | 32.38     | 167.54    | 146.92    | 12.86     | -        |
| Arizona / New Mexico Mountains | BA (ha/yr): 1984-2000 | 0                   | 5383.76  | 1823.16   | 2628.46   | 5258.06   | 2422.62   | 3196.24  |
|                                | BA (ha/yr): 2001-2017 | 0                   | 10949.32 | 11754.11  | 25497.89  | 15585.62  | 15346.07  | 1182.18  |
|                                | Percent change        | -                   | 103.38   | 544.71    | 870.07    | 196.41    | 533.45    | -63.01   |
| Canadian Rockies               | BA (ha/yr): 1984-2000 | 0                   | 0        | 10879.43  | 955.73    | 2416.84   | 1141.70   | 0        |
|                                | BA (ha/yr): 2001-2017 | 0                   | 45892.90 | 6662.99   | 8429.86   | 4490.71   | 30.31     | 0        |
|                                | Percent change        | -                   | Infinity | -38.76    | 782.04    | 85.81     | -97.35    | -        |
| North Cascades                 | BA (ha/yr): 1984-2000 | 2467.16             | 8277.75  | 3146.34   | 604.62    | 40.04     | 0         | 0        |
|                                | BA (ha/yr): 2001-2017 | 4184.46             | 8216.20  | 4643.48   | 6657.26   | 2675.91   | 0         | 0        |
|                                | Percent change        | 69.61               | -0.74    | 47.58     | 1001.07   | 6582.42   | -         | -        |
| Klamath Mountains / ...        | BA (ha/yr): 1984-2000 | 8675.28             | 10749.48 | 3274.17   | 1050.98   | 309.97    | 0         | 0        |
|                                | BA (ha/yr): 2001-2017 | 18632.03            | 13063.33 | 8246.85   | 3897.69   | 251.22    | 0         | 0        |
|                                | Percent change        | 114.77              | 21.53    | 151.88    | 270.86    | -18.95    | -         | -        |
| Median: all ecoregions         | Percent change        | 114.77              | 42.29    | 73.35     | 167.54    | 146.92    | 270.64    | 438.69   |



**Table S3. Statistical difference tests between slopes of quantile regression for the upper half (50%-100%) versus the lower half (0%-49%) of burned forest elevations.** Test results point to statistically significant difference between upslope trends in higher-elevation fires (50 to 100 quantiles) and in lower-elevation fires (0 to 49 quantiles) for all studied ecoregions. When combined with Fig. S1, these results point to statistically significant larger trends in upslope advancement of higher-elevation fires as compared to lower-elevation fires.

| Ecoregion             | Anderson-Darling test |         | Cramer Von Mises test |         | Kolmogorov-Smirnov test |           | Kruskal-Wallis test |           | Two-sample t-test |           | Mann-Whitney U-test |           |
|-----------------------|-----------------------|---------|-----------------------|---------|-------------------------|-----------|---------------------|-----------|-------------------|-----------|---------------------|-----------|
|                       | Test result           | P-value | Test result           | P-value | Test result             | P-value   | Test result         | P-value   | Test result       | P-value   | Test result         | P-value   |
| <b>All Ecoregions</b> | 1                     | ≤0.0005 | 1                     | 1       | 1                       | ≤1.76E-22 | 1                   | ≤7.97E-18 | 1                 | ≤1.57E-17 | 1                   | ≤8.21E-18 |

**Table S4. Interannual Pearson correlation analysis between May-September cloud-to-ground lightning strikes and Z<sub>90</sub> and BA<sub>90</sub>, as well as May-September VPD during 1990-2017.** Total lightning strikes in each ecoregion and ecoregion-average VPD, as well as observed burned forest data is used in this analysis.

| Ecoregion code | Ecoregion                      | Lightning – Z <sub>90</sub> |         | Lightning – Annual BA <sub>90</sub> |         | Lightning – VPD         |         |
|----------------|--------------------------------|-----------------------------|---------|-------------------------------------|---------|-------------------------|---------|
|                |                                | Correlation coefficient     | P-value | Correlation coefficient             | P-value | Correlation coefficient | P-value |
| 4              | Cascades                       | -0.10                       | 0.61    | 0.27                                | 0.21    | 0.34                    | 0.08    |
| 5              | Sierra Nevada                  | 0.23                        | 0.25    | 0.02                                | 0.93    | 0.00                    | 1.00    |
| 11             | Blue Mountains                 | -0.09                       | 0.66    | 0.06                                | 0.77    | 0.15                    | 0.44    |
| 13             | Central Basin and Range        | 0.25                        | 0.21    | 0.01                                | 0.96    | -0.06                   | 0.77    |
| 15             | Northern Rockies               | -0.08                       | 0.71    | -0.18                               | 0.40    | 0.08                    | 0.68    |
| 16             | Idaho Batholith                | 0.10                        | 0.63    | -0.41                               | 0.04    | -0.25                   | 0.21    |
| 17             | Middle Rockies                 | 0.00                        | 0.98    | -0.19                               | 0.34    | -0.25                   | 0.20    |
| 19             | Wasatch and Unita Mountains    | 0.26                        | 0.22    | 0.04                                | 0.84    | 0.06                    | 0.78    |
| 20             | Colorado Plateaus              | -0.07                       | 0.75    | -0.28                               | 0.19    | -0.09                   | 0.66    |
| 21             | Southern Rockies               | -0.23                       | 0.27    | -0.32                               | 0.13    | 0.13                    | 0.50    |
| 22             | Arizona / New Mexico Plateau   | 0.25                        | 0.24    | 0.13                                | 0.55    | 0.11                    | 0.57    |
| 23             | Arizona / New Mexico Mountains | -0.20                       | 0.31    | 0.07                                | 0.72    | 0.13                    | 0.51    |
| 41             | Canadian Rockies               | -0.13                       | 0.60    | -0.27                               | 0.28    | -0.08                   | 0.67    |
| 77             | North Cascades                 | -0.16                       | 0.48    | -0.29                               | 0.27    | 0.21                    | 0.28    |
| 78             | Klamath Mountains              | 0.16                        | 0.44    | -0.07                               | 0.75    | 0.41                    | 0.03    |

**Table S5. Interannual Pearson correlation analysis between Z<sub>90</sub> and May-September VPD and May-September CWD.** Ecoregion-average VPD and CWD, as well as observed burned forest data is used in this analysis. Analyses are presented with original data as well as their linearly detrended counterparts. Analysis with detrended data helps demonstrate that the relationship between the two variables is not merely due to long-term increasing trends in both variables, and the two variables are indeed correlated regardless of their trends.

| Ecoregion code | Ecoregion                      | Z <sub>90</sub> – VPD   |         | Detrended Z <sub>90</sub> – Detrended VPD |         | Z <sub>90</sub> – CWD   |         | Detrended Z <sub>90</sub> – Detrended CWD |         |
|----------------|--------------------------------|-------------------------|---------|-------------------------------------------|---------|-------------------------|---------|-------------------------------------------|---------|
|                |                                | Correlation coefficient | P-value | Correlation coefficient                   | P-value | Correlation coefficient | P-value | Correlation coefficient                   | P-value |
| 4              | Cascades                       | -0.08                   | 0.69    | -0.17                                     | 0.37    | -0.10                   | 0.59    | -0.19                                     | 0.32    |
| 5              | Sierra Nevada                  | 0.51                    | 0.00    | 0.44                                      | 0.01    | 0.45                    | 0.01    | 0.41                                      | 0.02    |
| 11             | Blue Mountains                 | 0.42                    | 0.02    | 0.35                                      | 0.05    | 0.41                    | 0.02    | 0.38                                      | 0.03    |
| 13             | Central Basin and Range        | 0.33                    | 0.06    | 0.27                                      | 0.12    | 0.24                    | 0.18    | 0.21                                      | 0.24    |
| 15             | Northern Rockies               | 0.32                    | 0.09    | 0.25                                      | 0.19    | 0.33                    | 0.08    | 0.26                                      | 0.17    |
| 16             | Idaho Batholith                | 0.28                    | 0.12    | 0.18                                      | 0.31    | 0.21                    | 0.25    | 0.15                                      | 0.41    |
| 17             | Middle Rockies                 | 0.49                    | 0.00    | 0.45                                      | 0.01    | 0.43                    | 0.01    | 0.41                                      | 0.02    |
| 19             | Wasatch and Unita Mountains    | 0.42                    | 0.02    | 0.43                                      | 0.02    | 0.38                    | 0.04    | 0.38                                      | 0.04    |
| 20             | Colorado Plateaus              | 0.16                    | 0.41    | 0.19                                      | 0.32    | 0.24                    | 0.21    | 0.24                                      | 0.22    |
| 21             | Southern Rockies               | 0.65                    | 0.00    | 0.61                                      | 0.00    | 0.57                    | 0.00    | 0.53                                      | 0.00    |
| 22             | Arizona / New Mexico Plateau   | 0.21                    | 0.29    | 0.19                                      | 0.34    | 0.26                    | 0.18    | 0.30                                      | 0.13    |
| 23             | Arizona / New Mexico Mountains | 0.41                    | 0.02    | 0.46                                      | 0.01    | 0.46                    | 0.01    | 0.49                                      | 0.00    |
| 41             | Canadian Rockies               | 0.24                    | 0.30    | 0.10                                      | 0.67    | 0.34                    | 0.14    | 0.44                                      | 0.04    |
| 77             | North Cascades                 | 0.35                    | 0.09    | 0.37                                      | 0.07    | 0.41                    | 0.04    | 0.43                                      | 0.03    |
| 78             | Klamath Mountains              | 0.25                    | 0.18    | 0.25                                      | 0.18    | 0.19                    | 0.32    | 0.18                                      | 0.33    |

**Table S6. Interannual Pearson correlation analysis between May-September VPD and forest burned area above the thresholds of 2,000 m (BA<sub>2000</sub>), 2,500 m (BA<sub>2500</sub>) and the 90<sup>th</sup> percentile of forest elevational distribution in each ecoregion (BA<sub>90</sub>).** Ecoregion-average VPD and observed burned forest data is used in this analysis.

| Ecoregion code | Ecoregion                      | BA <sub>2000</sub> – VPD |         | BA <sub>2500</sub> – VPD |         | BA <sub>90</sub> – VPD  |         |
|----------------|--------------------------------|--------------------------|---------|--------------------------|---------|-------------------------|---------|
|                |                                | Correlation coefficient  | P-value | Correlation coefficient  | P-value | Correlation coefficient | P-value |
| 4              | Cascades                       | 0.63                     | 0.00    | 0.34                     | 0.20    | 0.70                    | 0.00    |
| 5              | Sierra Nevada                  | 0.59                     | 0.00    | 0.53                     | 0.00    | 0.57                    | 0.00    |
| 11             | Blue Mountains                 | 0.31                     | 0.10    | 0.33                     | 0.22    | 0.36                    | 0.04    |
| 13             | Central Basin and Range        | 0.51                     | 0.00    | 0.43                     | 0.01    | 0.41                    | 0.02    |
| 15             | Northern Rockies               | 0.60                     | 0.00    | 0.49                     | 0.10    | 0.56                    | 0.00    |
| 16             | Idaho Batholith                | 0.56                     | 0.00    | 0.63                     | 0.00    | 0.58                    | 0.00    |
| 17             | Middle Rockies                 | 0.50                     | 0.01    | 0.49                     | 0.01    | 0.56                    | 0.00    |
| 19             | Wasatch and Unita Mountains    | 0.58                     | 0.00    | 0.46                     | 0.01    | 0.57                    | 0.00    |
| 20             | Colorado Plateaus              | 0.65                     | 0.00    | 0.64                     | 0.00    | 0.63                    | 0.00    |
| 21             | Southern Rockies               | 0.64                     | 0.00    | 0.61                     | 0.00    | 0.64                    | 0.00    |
| 22             | Arizona / New Mexico Plateau   | 0.19                     | 0.35    | 0.20                     | 0.36    | 0.40                    | 0.04    |
| 23             | Arizona / New Mexico Mountains | 0.63                     | 0.00    | 0.61                     | 0.00    | 0.58                    | 0.00    |
| 41             | Canadian Rockies               | 0.24                     | 0.77    | 0.03                     | 0.91    | 0.06                    | 0.80    |
| 77             | North Cascades                 | 0.57                     | 0.02    | 0.62                     | 0.03    | 0.54                    | 0.02    |
| 78             | Klamath Mountains              | 0.50                     | 0.02    | 0.09                     | 0.75    | 0.51                    | 0.01    |

**Table S7. Interannual Pearson correlation analysis between May-September CWD and forest burned area above the thresholds of 2,000 m (BA<sub>2000</sub>), 2,500 m (BA<sub>2500</sub>) and the 90<sup>th</sup> percentile of forest elevational distribution in each ecoregion (BA<sub>90</sub>). Ecoregion-average CWD and observed burned forest data is used in this analysis.**

| Ecoregion code | Ecoregion                      | BA <sub>2000</sub> – CWD |         | BA <sub>2500</sub> – CWD |         | BA <sub>90</sub> – CWD  |         |
|----------------|--------------------------------|--------------------------|---------|--------------------------|---------|-------------------------|---------|
|                |                                | Correlation coefficient  | P-value | Correlation coefficient  | P-value | Correlation coefficient | P-value |
| 4              | Cascades                       | 0.56                     | 0.00    | 0.09                     | 0.73    | 0.59                    | 0.00    |
| 5              | Sierra Nevada                  | 0.56                     | 0.00    | 0.48                     | 0.00    | 0.58                    | 0.00    |
| 11             | Blue Mountains                 | 0.36                     | 0.05    | 0.37                     | 0.16    | 0.44                    | 0.01    |
| 13             | Central Basin and Range        | 0.39                     | 0.02    | 0.29                     | 0.10    | 0.33                    | 0.05    |
| 15             | Northern Rockies               | 0.70                     | 0.00    | 0.44                     | 0.15    | 0.65                    | 0.00    |
| 16             | Idaho Batholith                | 0.55                     | 0.00    | 0.55                     | 0.00    | 0.57                    | 0.00    |
| 17             | Middle Rockies                 | 0.51                     | 0.00    | 0.50                     | 0.01    | 0.56                    | 0.00    |
| 19             | Wasatch and Unita Mountains    | 0.50                     | 0.01    | 0.41                     | 0.03    | 0.46                    | 0.01    |
| 20             | Colorado Plateaus              | 0.55                     | 0.00    | 0.52                     | 0.01    | 0.53                    | 0.00    |
| 21             | Southern Rockies               | 0.61                     | 0.00    | 0.57                     | 0.00    | 0.60                    | 0.00    |
| 22             | Arizona / New Mexico Plateau   | 0.12                     | 0.55    | 0.15                     | 0.49    | 0.31                    | 0.12    |
| 23             | Arizona / New Mexico Mountains | 0.51                     | 0.00    | 0.52                     | 0.00    | 0.46                    | 0.01    |
| 41             | Canadian Rockies               | 0.60                     | 0.00    | 0.57                     | 0.01    | 0.72                    | 0.00    |
| 77             | North Cascades                 | 0.67                     | 0.00    | 0.69                     | 0.01    | 0.65                    | 0.00    |
| 78             | Klamath Mountains              | 0.54                     | 0.01    | -0.03                    | 0.92    | 0.63                    | 0.00    |

**Table S8. VPD-driven trend in  $Z_{90}$  during 1984-2017, and the forest area encapsulated between VPD-estimated  $Z_{90}$  at 1984 and  $Z_{90}$  at 2017.** Area of forest cover in each ecoregion and fraction of forest cover encapsulated between VPD-estimated  $Z_{90}$  at 1984 and  $Z_{90}$  at 2017 are also provided. The latter is hypothesized to be the forested land that has become vulnerable to fire due to increasing VPD trends. VPD-driven trends in  $Z_{90}$  during 1984-2017 are calculated as the product of linear VPD trend and the VPD- $Z_{90}$  regression. Regression coefficient in terms of change in  $Z_{90}$  (m) in response to unit increase in VPD z-score (one standard deviation departure from normal;  $\frac{\Delta Z_{90} \text{ (m)}}{\Delta \text{VPD (z-score)}}$ ) is also provided for each ecoregion. All analyses are based on type I linear regression analysis. VPD is used in terms of z-score to be comparable across ecoregions in terms of departure from normal conditions.

| Ecoregion code | Ecoregion                      | VPD (z-score) |      | VPD-estimated $Z_{90}$ (m) |         | Z <sub>90</sub> -VPD relationship                                                                      | Area of forest cover between $Z_{90}$ at 1984 & $Z_{90}$ at 2017 (km <sup>2</sup> ) | Fraction of forest cover encapsulated between $Z_{90}$ at 1984 & $Z_{90}$ at 2017 | Area of forest cover in each ecoregion (km <sup>2</sup> ) |
|----------------|--------------------------------|---------------|------|----------------------------|---------|--------------------------------------------------------------------------------------------------------|-------------------------------------------------------------------------------------|-----------------------------------------------------------------------------------|-----------------------------------------------------------|
|                |                                | 1984          | 2017 | 1984                       | 2017    | Regression coefficient<br>$\left(\frac{\Delta Z_{90} \text{ (m)}}{\Delta \text{VPD (z-score)}}\right)$ |                                                                                     |                                                                                   |                                                           |
| 4              | Cascades                       | -0.44         | 0.44 | 1713.34                    | 1688.17 | -28.48                                                                                                 | -698.46                                                                             | -1.28%                                                                            | 54657.68                                                  |
| 5              | Sierra Nevada                  | -0.81         | 0.81 | 2165.27                    | 2575.24 | 253.16                                                                                                 | 5981.51                                                                             | 15.61%                                                                            | 38329.70                                                  |
| 11             | Blue Mountains                 | -0.65         | 0.65 | 1780.51                    | 2039.75 | 199.63                                                                                                 | 2876.87                                                                             | 7.70%                                                                             | 37384.68                                                  |
| 13             | Central Basin and Range        | -0.71         | 0.71 | 2569.93                    | 2738.94 | 119.71                                                                                                 | 2348.13                                                                             | 4.48%                                                                             | 52445.67                                                  |
| 15             | Northern Rockies               | -0.56         | 0.56 | 1454.12                    | 1616.40 | 144.84                                                                                                 | 6991.74                                                                             | 10.74%                                                                            | 65073.23                                                  |
| 16             | Idaho Batholith                | -0.68         | 0.68 | 2121.02                    | 2226.34 | 77.25                                                                                                  | 4186.01                                                                             | 9.62%                                                                             | 43532.04                                                  |
| 17             | Middle Rockies                 | -0.48         | 0.48 | 2401.16                    | 2648.21 | 258.09                                                                                                 | 15719.47                                                                            | 18.13%                                                                            | 86702.96                                                  |
| 19             | Wasatch and Unita Mountains    | -0.40         | 0.40 | 2664.03                    | 2764.19 | 126.55                                                                                                 | 2478.38                                                                             | 7.75%                                                                             | 31967.96                                                  |
| 20             | Colorado Plateaus              | -0.43         | 0.43 | 2310.42                    | 2347.51 | 43.38                                                                                                  | 1346.80                                                                             | 3.09%                                                                             | 43627.82                                                  |
| 21             | Southern Rockies               | -0.59         | 0.59 | 2628.52                    | 2957.23 | 280.05                                                                                                 | 27973.52                                                                            | 27.61%                                                                            | 101303.67                                                 |
| 22             | Arizona / New Mexico Plateau   | -0.48         | 0.48 | 2176.84                    | 2240.49 | 66.93                                                                                                  | 2815.86                                                                             | 11.31%                                                                            | 24887.51                                                  |
| 23             | Arizona / New Mexico Mountains | -0.52         | 0.52 | 2459.73                    | 2581.28 | 117.16                                                                                                 | 4983.27                                                                             | 6.89%                                                                             | 72321.80                                                  |
| 41             | Canadian Rockies               | -0.17         | 0.17 | 1990.63                    | 1994.93 | 36.59                                                                                                  | 66.01                                                                               | 0.42%                                                                             | 15656.67                                                  |
| 77             | North Cascades                 | -0.26         | 0.26 | 1313.88                    | 1409.92 | 181.51                                                                                                 | 1606.46                                                                             | 6.82%                                                                             | 23565.23                                                  |
| 78             | Klamath Mountains              | -0.60         | 0.60 | 1177.84                    | 1298.41 | 99.87                                                                                                  | 2892.45                                                                             | 7.31%                                                                             | 39565.30                                                  |
| Western U.S.   |                                |               |      |                            |         |                                                                                                        | 81568.02                                                                            | 11.16%                                                                            | 731021.9                                                  |

**Table S9. VPD-driven trend in annual BA<sub>90</sub> during 1984-2017**, calculated as the product of linear VPD trend and the VPD-BA<sub>90</sub> regression. Regression coefficient in terms of change in annual BA<sub>90</sub> (km<sup>2</sup>) in response to unit increase in VPD z-score (one standard deviation departure from normal;  $\frac{\Delta BA_{90} (km^2)}{\Delta VPD (z-score)}$ ) is provided for each ecoregion. Increase in VPD-driven annual BA<sub>90</sub> (km<sup>2</sup>) between 1984 and 2017 is also provided. All analyses are based on type I linear regression analysis. VPD is used in terms of z-score to be comparable across ecoregions in terms of departure from normal conditions.

| Ecoregion code | Ecoregion                      | VPD (z-score) |      | VPD-estimated annual BA <sub>90</sub> (km <sup>2</sup> ) |        | Annual BA <sub>90</sub> -VPD relationship                                          | Increase in VPD-driven annual BA <sub>90</sub> (km <sup>2</sup> ) between 1984 & 2017<br>km <sup>2</sup><br>(Percent increase) |
|----------------|--------------------------------|---------------|------|----------------------------------------------------------|--------|------------------------------------------------------------------------------------|--------------------------------------------------------------------------------------------------------------------------------|
|                |                                | 1984          | 2017 | 1984                                                     | 2017   | Regression coefficient<br>( $\frac{\Delta BA_{90} (km^2)}{\Delta VPD (z-score)}$ ) |                                                                                                                                |
| 4              | Cascades                       | -0.44         | 0.44 | 5.90                                                     | 19.14  | 15.04                                                                              | 13.23 (224.30%)                                                                                                                |
| 5              | Sierra Nevada                  | -0.81         | 0.81 | 13.58                                                    | 41.54  | 17.26                                                                              | 27.96 (205.91%)                                                                                                                |
| 11             | Blue Mountains                 | -0.65         | 0.65 | 14.37                                                    | 41.66  | 20.99                                                                              | 27.29 (189.85%)                                                                                                                |
| 13             | Central Basin and Range        | -0.71         | 0.71 | 7.96                                                     | 39.43  | 22.16                                                                              | 31.46 (395.05%)                                                                                                                |
| 15             | Northern Rockies               | -0.56         | 0.56 | 0.00                                                     | 38.91  | 34.74                                                                              | 38.91 (-)                                                                                                                      |
| 16             | Idaho Batholith                | -0.68         | 0.68 | 14.13                                                    | 81.52  | 49.56                                                                              | 67.40 (477.10%)                                                                                                                |
| 17             | Middle Rockies                 | -0.48         | 0.48 | 3.33                                                     | 56.02  | 54.88                                                                              | 52.69 (1581.31%)                                                                                                               |
| 19             | Wasatch and Unita Mountains    | -0.40         | 0.40 | 3.60                                                     | 7.62   | 5.03                                                                               | 4.02 (111.73%)                                                                                                                 |
| 20             | Colorado Plateaus              | -0.43         | 0.43 | 2.32                                                     | 10.41  | 9.41                                                                               | 8.09 (349.32%)                                                                                                                 |
| 21             | Southern Rockies               | -0.59         | 0.59 | 2.95                                                     | 28.54  | 21.69                                                                              | 25.59 (868.39%)                                                                                                                |
| 22             | Arizona / New Mexico Plateau   | -0.48         | 0.48 | 1.05                                                     | 4.83   | 3.94                                                                               | 3.79 (361.23%)                                                                                                                 |
| 23             | Arizona / New Mexico Mountains | -0.52         | 0.52 | 34.81                                                    | 72.30  | 36.05                                                                              | 37.50 (107.73%)                                                                                                                |
| 41             | Canadian Rockies               | -0.17         | 0.17 | 20.72                                                    | 21.06  | 0.98                                                                               | 0.33 (1.60%)                                                                                                                   |
| 77             | North Cascades                 | -0.26         | 0.26 | 11.44                                                    | 22.23  | 20.76                                                                              | 10.79 (94.38%)                                                                                                                 |
| 78             | Klamath Mountains              | -0.60         | 0.60 | 13.65                                                    | 48.76  | 29.26                                                                              | 35.12 (257.34%)                                                                                                                |
| Western U.S.   |                                |               |      | 149.81                                                   | 533.97 |                                                                                    | 384.16 (256.43%)                                                                                                               |

**Table S10. Interannual Pearson correlation analysis between Z<sub>90</sub> and annual NDVI above the thresholds of 2,000 m (NDVI<sub>2000</sub>) and 2,500 m (NDVI<sub>2500</sub>) in each ecoregion.** Observed burned forest data is used in this analysis. Assumption is that NDVI<sub>2000</sub> and NDVI<sub>2500</sub> represent high-elevation productivity in forests.

| Ecoregion code | Ecoregion                      | Z <sub>90</sub> – NDVI <sub>2000</sub> |         | Z <sub>90</sub> – NDVI <sub>2500</sub> |         |
|----------------|--------------------------------|----------------------------------------|---------|----------------------------------------|---------|
|                |                                | Correlation coefficient                | P-value | Correlation coefficient                | P-value |
| 4              | Cascades                       | -0.08                                  | 0.66    | -0.09                                  | 0.65    |
| 5              | Sierra Nevada                  | -0.05                                  | 0.78    | 0.00                                   | 0.99    |
| 11             | Blue Mountains                 | 0.29                                   | 0.11    | 0.18                                   | 0.32    |
| 13             | Central Basin and Range        | 0.03                                   | 0.87    | 0.01                                   | 0.94    |
| 15             | Northern Rockies               | 0.20                                   | 0.30    | -0.03                                  | 0.87    |
| 16             | Idaho Batholith                | -0.19                                  | 0.29    | -0.18                                  | 0.32    |
| 17             | Middle Rockies                 | 0.16                                   | 0.37    | 0.19                                   | 0.30    |
| 19             | Wasatch and Unita Mountains    | 0.21                                   | 0.27    | 0.21                                   | 0.27    |
| 20             | Colorado Plateaus              | -0.07                                  | 0.70    | 0.01                                   | 0.98    |
| 21             | Southern Rockies               | 0.35                                   | 0.06    | 0.36                                   | 0.05    |
| 22             | Arizona / New Mexico Plateau   | 0.38                                   | 0.05    | 0.43                                   | 0.03    |
| 23             | Arizona / New Mexico Mountains | 0.37                                   | 0.03    | 0.39                                   | 0.02    |
| 41             | Canadian Rockies               | 0.58                                   | 0.01    | 0.59                                   | 0.00    |
| 77             | North Cascades                 | 0.21                                   | 0.31    | 0.26                                   | 0.20    |
| 78             | Klamath Mountains              | 0.52                                   | 0.00    | 0.50                                   | 0.01    |

**Table S11. Interannual Pearson correlation analysis between annual forest burned area and NDVI, both above the thresholds of 2,000 m and 2,500 m.** NDVI<sub>2000</sub>/BA<sub>2000</sub> and NDVI<sub>2500</sub>/BA<sub>2500</sub> represent annual NDVI/area of burned forest above 2,000 m and 2,500 m, respectively. Observed burned forest data is used in this analysis. Assumption is that NDVI<sub>2000</sub> and NDVI<sub>2500</sub> represent high-elevation productivity.

| Ecoregion code | Ecoregion                      | BA <sub>2000</sub> – NDVI <sub>2000</sub> |         | BA <sub>2500</sub> – NDVI <sub>2500</sub> |         |
|----------------|--------------------------------|-------------------------------------------|---------|-------------------------------------------|---------|
|                |                                | Correlation coefficient                   | P-value | Correlation coefficient                   | P-value |
| 4              | Cascades                       | 0.18                                      | 0.37    | -0.41                                     | 0.11    |
| 5              | Sierra Nevada                  | 0.10                                      | 0.59    | -0.13                                     | 0.48    |
| 11             | Blue Mountains                 | 0.21                                      | 0.27    | 0.29                                      | 0.28    |
| 13             | Central Basin and Range        | 0.34                                      | 0.05    | 0.14                                      | 0.42    |
| 15             | Northern Rockies               | 0.11                                      | 0.64    | -0.26                                     | 0.41    |
| 16             | Idaho Batholith                | -0.18                                     | 0.32    | -0.19                                     | 0.29    |
| 17             | Middle Rockies                 | 0.17                                      | 0.39    | 0.19                                      | 0.32    |
| 19             | Wasatch and Unita Mountains    | 0.28                                      | 0.14    | 0.17                                      | 0.37    |
| 20             | Colorado Plateaus              | 0.29                                      | 0.13    | 0.34                                      | 0.08    |
| 21             | Southern Rockies               | 0.38                                      | 0.04    | 0.42                                      | 0.03    |
| 22             | Arizona / New Mexico Plateau   | 0.19                                      | 0.36    | 0.08                                      | 0.73    |
| 23             | Arizona / New Mexico Mountains | 0.35                                      | 0.04    | 0.30                                      | 0.09    |
| 41             | Canadian Rockies               | 0.17                                      | 0.47    | 0.28                                      | 0.26    |
| 77             | North Cascades                 | -0.06                                     | 0.83    | -0.12                                     | 0.70    |
| 78             | Klamath Mountains              | 0.33                                      | 0.12    | -0.43                                     | 0.11    |

**Table S12. Regression slopes between May-September VPD and Z<sub>90</sub> and BA<sub>90</sub>, based on type II linear regression analyses** (complementary to Tables S8 & S9 that use type I regression analyses). Observed burned forest data is used in this analysis. VPD is used in terms of z-score to be comparable across ecoregions in terms of departure from normal conditions.

| Ecoregion code | Ecoregion                      | Z <sub>90</sub> -VPD                                                                                             | Annual BA <sub>90</sub> -VPD                                                                                                       |
|----------------|--------------------------------|------------------------------------------------------------------------------------------------------------------|------------------------------------------------------------------------------------------------------------------------------------|
|                |                                | Regression coefficient (type II)<br>$\left(\frac{\Delta Z_{90} \text{ (m)}}{\Delta \text{VPD (z-score)}}\right)$ | Regression coefficient (type II)<br>$\left(\frac{\Delta \text{BA}_{90} \text{ (km}^2\text{)}}{\Delta \text{VPD (z-score)}}\right)$ |
| 4              | Cascades                       | -372.91                                                                                                          | 21.36                                                                                                                              |
| 5              | Sierra Nevada                  | 496.56                                                                                                           | 30.13                                                                                                                              |
| 11             | Blue Mountains                 | 480.11                                                                                                           | 57.99                                                                                                                              |
| 13             | Central Basin and Range        | 363.44                                                                                                           | 54.33                                                                                                                              |
| 15             | Northern Rockies               | 447.10                                                                                                           | 65.73                                                                                                                              |
| 16             | Idaho Batholith                | 276.57                                                                                                           | 85.48                                                                                                                              |
| 17             | Middle Rockies                 | 521.41                                                                                                           | 98.34                                                                                                                              |
| 19             | Wasatch and Unita Mountains    | 301.29                                                                                                           | 8.95                                                                                                                               |
| 20             | Colorado Plateaus              | 270.91                                                                                                           | 15.08                                                                                                                              |
| 21             | Southern Rockies               | 429.53                                                                                                           | 34.11                                                                                                                              |
| 22             | Arizona / New Mexico Plateau   | 318.76                                                                                                           | 9.89                                                                                                                               |
| 23             | Arizona / New Mexico Mountains | 284.24                                                                                                           | 62.53                                                                                                                              |
| 41             | Canadian Rockies               | 407.89                                                                                                           | 47.55                                                                                                                              |
| 77             | North Cascades                 | 521.18                                                                                                           | 38.05                                                                                                                              |
| 78             | Klamath Mountains              | 395.98                                                                                                           | 57.50                                                                                                                              |
